# Supplementary material for: A facile strategy of using MoS2 quantum dots for fluorescence-based targeted detection of nitrobenzene
Source: Royal Society of Chemistry journal article supplement (doi:10.1039/d3ra00912b), 2023-01-01
Supplement: d3ra00912b1.pdf [file d3ra00912b1.pdf]

## Electronic Supplementary Information

### A facile strategy of MoS<sub>2</sub> quantum dots for fluorescence-based targeted detection of nitrobenzene

Bhasha Sathyan,<sup>a</sup> Ann Mary Tomy,<sup>a</sup> Neema PM,<sup>a,b</sup> Jobin Cyriac<sup>a\*</sup>

<sup>a</sup>Department of Chemistry, Indian Institute of Space Science and Technology,  
Thiruvananthapuram

<sup>b</sup>School of Physics, Indian Institute of Science Education and Research, Thiruvananthapuram

\*Email: jobincyriac@iist.ac.in

| Figure No. | Content                                                                                                                                                                                                                                                                                                                                                                                              | Page No. |
|------------|------------------------------------------------------------------------------------------------------------------------------------------------------------------------------------------------------------------------------------------------------------------------------------------------------------------------------------------------------------------------------------------------------|----------|
| S1         | (a-b) The higher magnification TEM image of MoS <sub>2</sub> QDs. (c) EDS spectrum of MoS <sub>2</sub> QDs taken from SEM image (i) and EDS mapping of MoS <sub>2</sub> QDs (ii-iv) showing the elemental distribution. (d) The particle size distribution of MoS <sub>2</sub> QDs obtained from the dynamic light scattering (DLS) analysis. (e) Showing the height profile drawn on the AFM image. | 2        |
| S2         | Fluorescence response of MoS <sub>2</sub> QDs for a period of 30 days                                                                                                                                                                                                                                                                                                                                | 3        |
| S3         | Emission of MoS <sub>2</sub> QDs after exposure to UV irradiation (48 W power) at various time intervals                                                                                                                                                                                                                                                                                             | 3        |
| S4         | Lifetime decay curve of MoS <sub>2</sub> QDs and MoS <sub>2</sub> QDs with different analytes such as (a) HgCl <sub>2</sub> , (b) NMP, (c) PhCl, and (d) NMP.                                                                                                                                                                                                                                        | 4        |
| S5         | UV-visible spectra of MoS <sub>2</sub> QDs and MoS <sub>2</sub> QDs at different concentrations of NB (2.5 μM-50 μM).                                                                                                                                                                                                                                                                                | 4        |
| S6         | Plots of F <sub>0</sub> /F vs [Nitrobenzene] at different temperatures                                                                                                                                                                                                                                                                                                                               | 5        |
| S7         | The stern-Volmer plot of fluorescence intensity before and after correcting the inner-filter effect                                                                                                                                                                                                                                                                                                  | 5        |
| S8         | (a) Percentage of quenching by different interfering analytes (0.01mM) before and after the addition of (0.01mM) NB. (b) Percentage of quenching by different interfering nitro explosives (0.01mM) before and after the addition of (0.01mM) NB.                                                                                                                                                    | 6        |
| S9         | Lifetime decay curve of MoS <sub>2</sub> QDs and MoS <sub>2</sub> QDs with different nitro explosives such as (a) p-NP, (b) TNP, (c) o-NP, and (d) DNT                                                                                                                                                                                                                                               | 6        |
| S10        | The reproducibility of the sensor material                                                                                                                                                                                                                                                                                                                                                           | 7        |
| TS1        | A comparison study with previously reported sensors                                                                                                                                                                                                                                                                                                                                                  | 7        |
| TS2        | The lifetime component of MoS <sub>2</sub> QDs and MoS <sub>2</sub> QDs-NB                                                                                                                                                                                                                                                                                                                           | 8        |

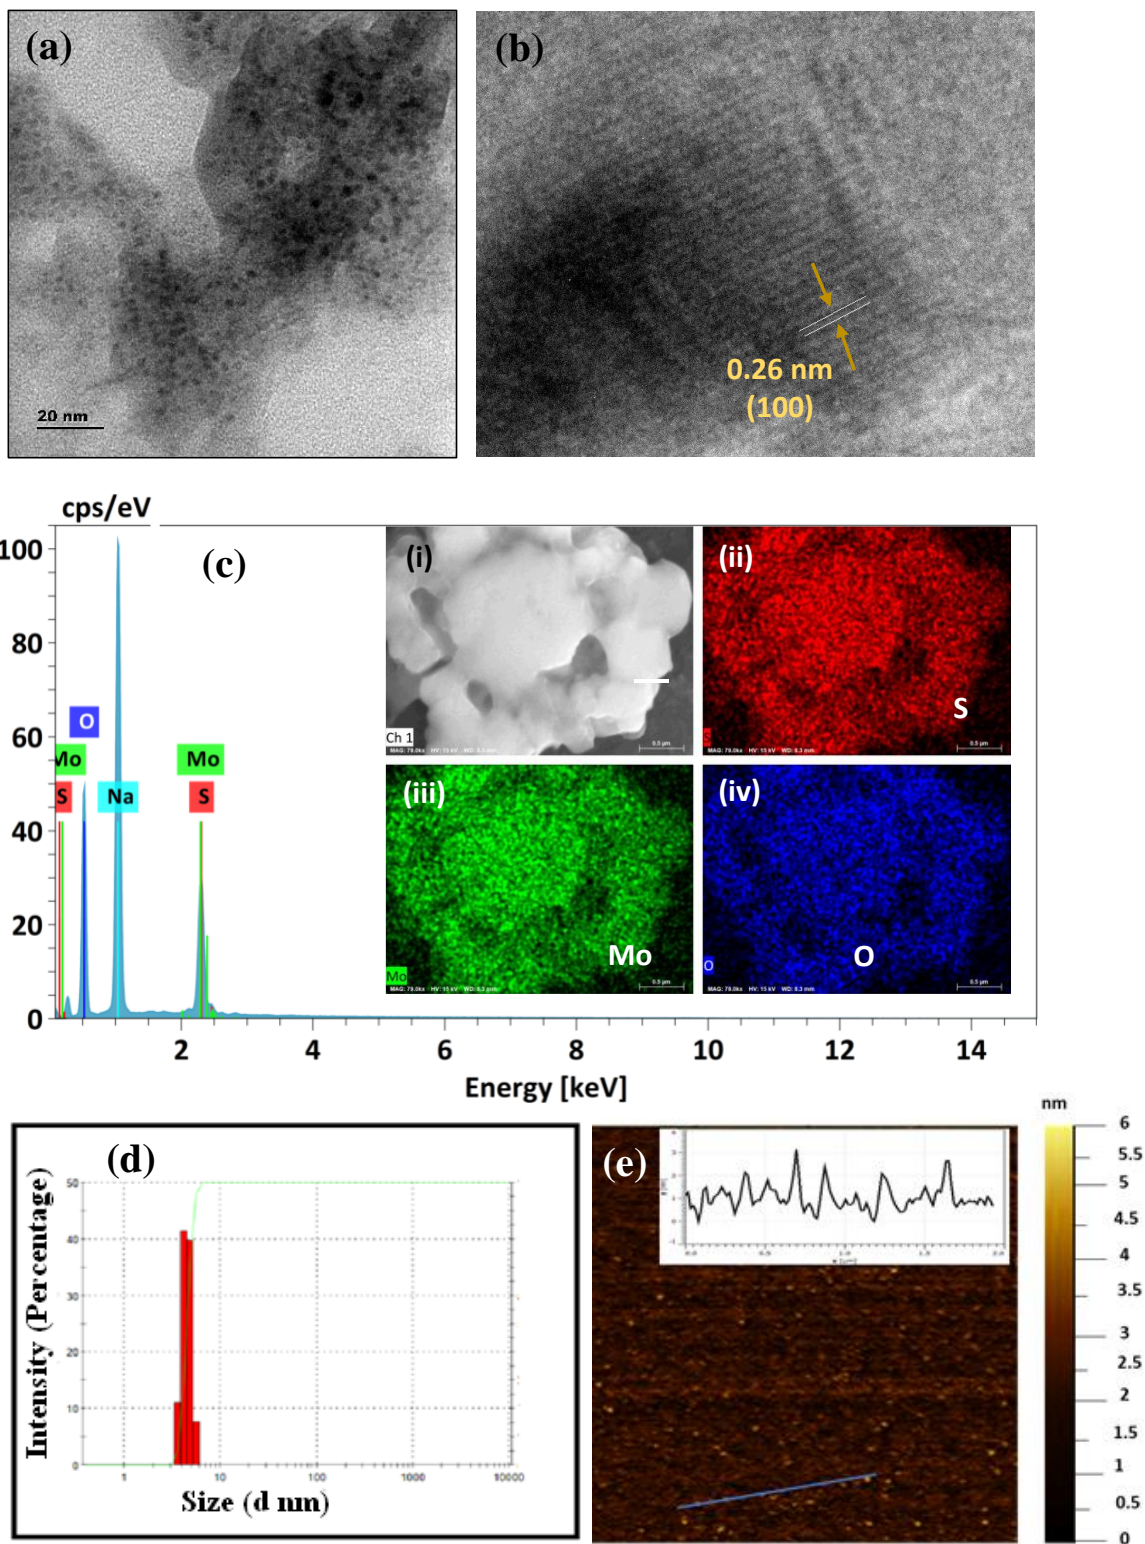

Fig. S1.(a) TEM micrograph of MoS<sub>2</sub> QDs. Scale bar is 20 nm. (b) A higher magnification image showing (100) planes (arrows indicating lattice fringe spacing corresponds to (100) plane). (c) EDS spectrum of MoS<sub>2</sub> QDs taken from the area shown in SEM image of MoS<sub>2</sub> QDs (i) and EDS mapping of MoS<sub>2</sub> QDs (ii-iv) showing the elemental distribution. (d) The particle size distribution of MoS<sub>2</sub> QDs obtained from the dynamic light scattering (DLS) analysis. (e) Showing the height profile drawn on the AFM image.

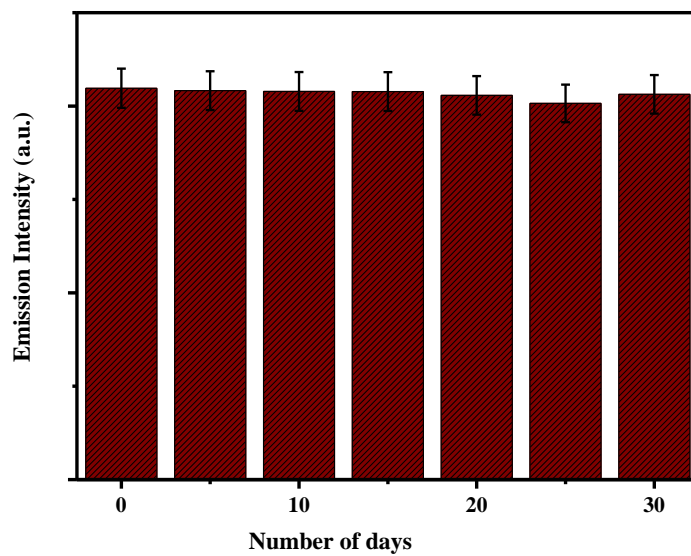

Fig. S2. Fluorescence response of MoS<sub>2</sub> QDs for a period of 30 days. The sample was kept under ambient conditions.

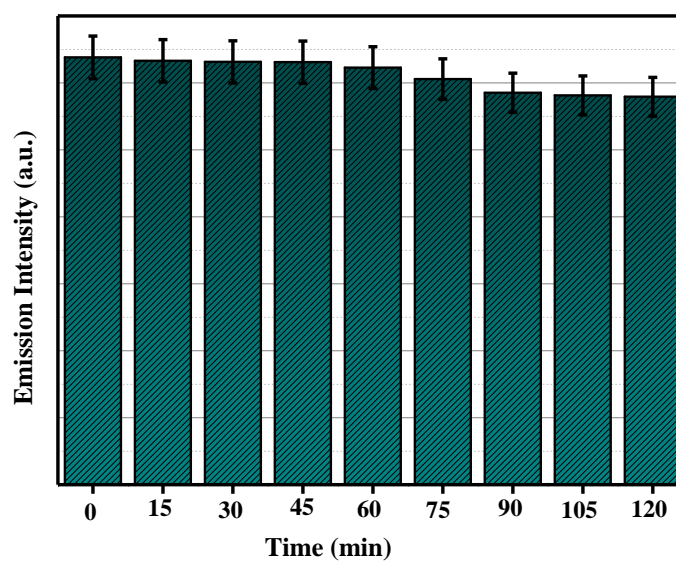

Fig. S3. Emission of MoS<sub>2</sub> QDs after exposure of UV irradiation (48 W power) at various time intervals.

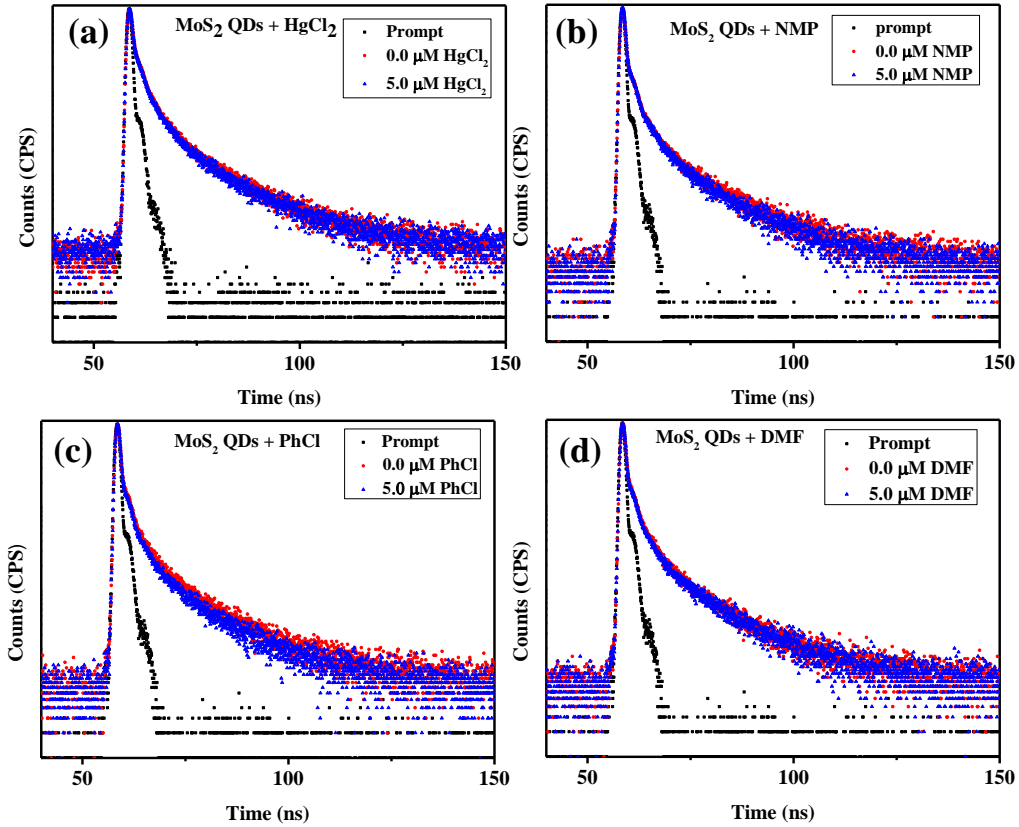

Fig. S4. Lifetime decay curve of MoS<sub>2</sub> QDs and MoS<sub>2</sub> QDs with different analytes such as (a) HgCl<sub>2</sub>, (b) NMP, (c) PhCl, and (d) NMP. The instrument response is termed as prompt in the graphs.

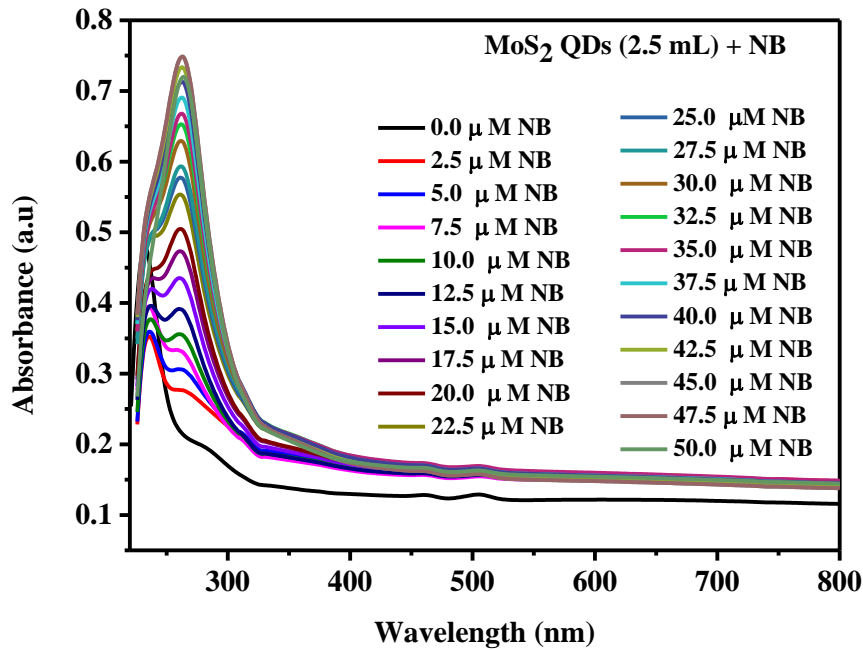

Fig. S5. UV-visible spectra of MoS<sub>2</sub> QDs (black) and MoS<sub>2</sub> QDs at different concentrations of NB (2.5 μM-50 μM).

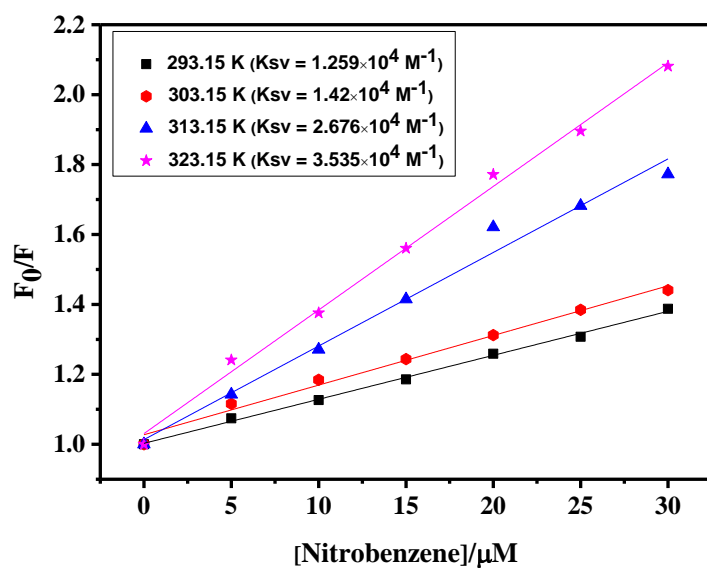

Fig. S6. Plots of  $F_0/F$  vs  $[\text{Nitrobenzene}]$  at different temperatures. The solid line shows fit to the simple Stern-Volmer equation (eq (1)).

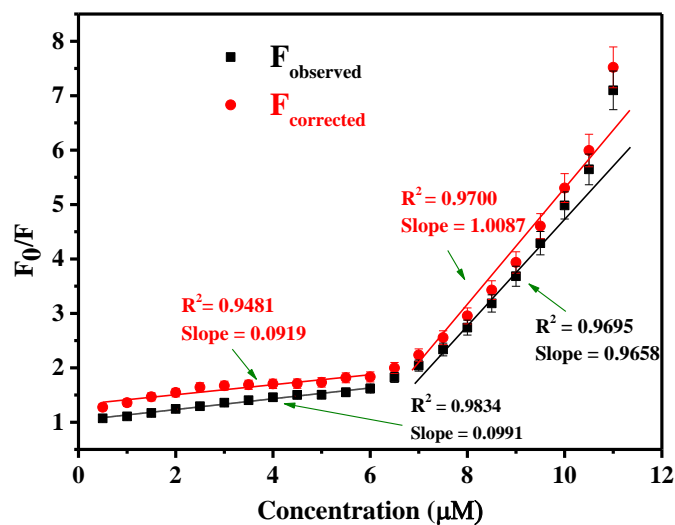

Fig. S7. Relationship between  $F_0/F$  vs concentration of NB of  $F_{\text{observed}}$  and  $F_{\text{corrected}}$ , showing linear plot with different slopes.  $F_0$  and  $F$  are the steady state intensity before and after the addition of NB, respectively.

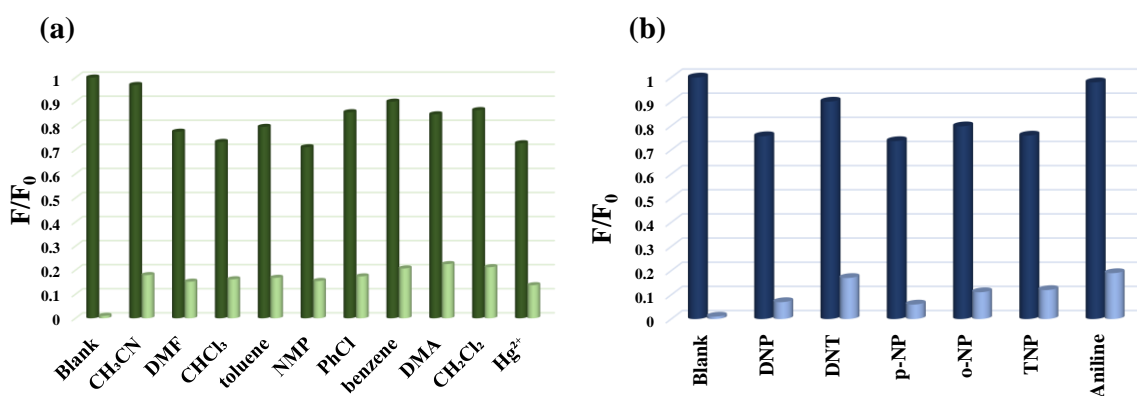

Fig. S8 (a) Percentage of quenching by different interfering analytes (0.01mM) before and after the addition of (0.01mM) NB. (b) Percentage of quenching by different interfering nitro explosives (0.01mM) before and after the addition of (0.01mM) NB.

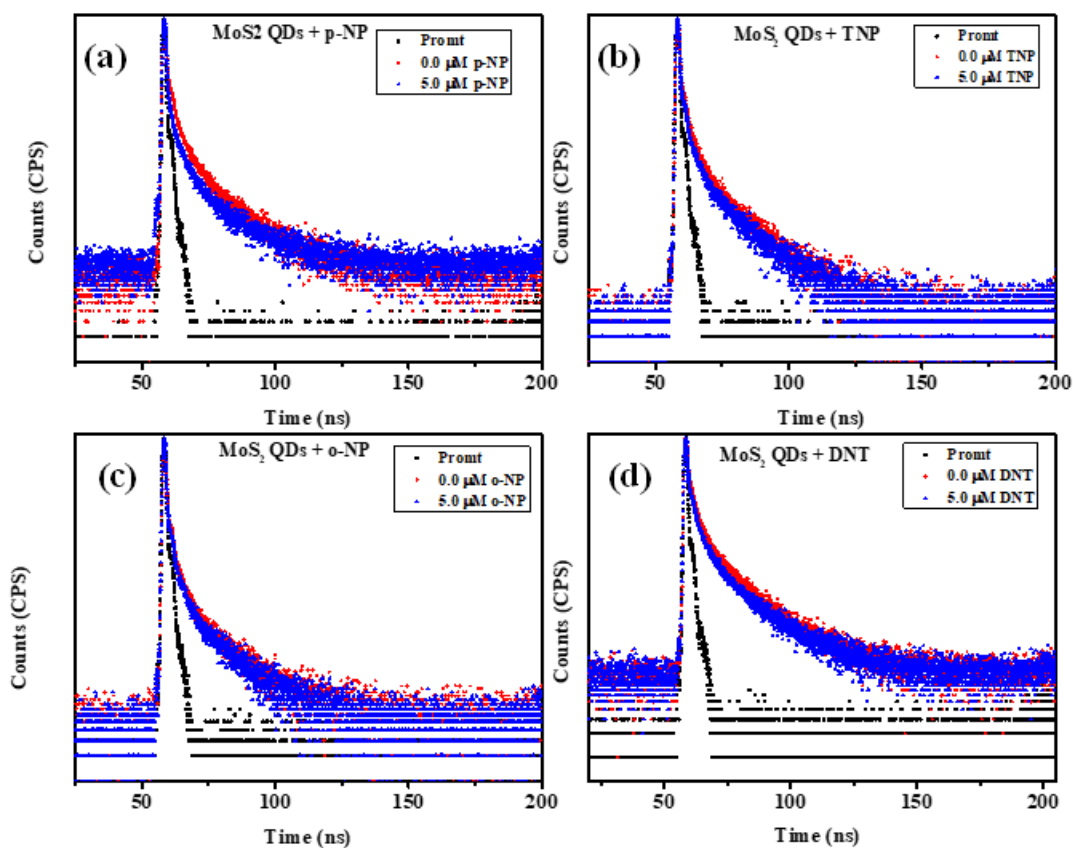

Fig. S9. Lifetime decay curve of MoS<sub>2</sub> QDs and MoS<sub>2</sub> QDs with different nitro explosives such as (a) p-NP, (b) TNP, (c) o-NP, and (d) DNT. . The instrument response is termed as prompt in the graphs.

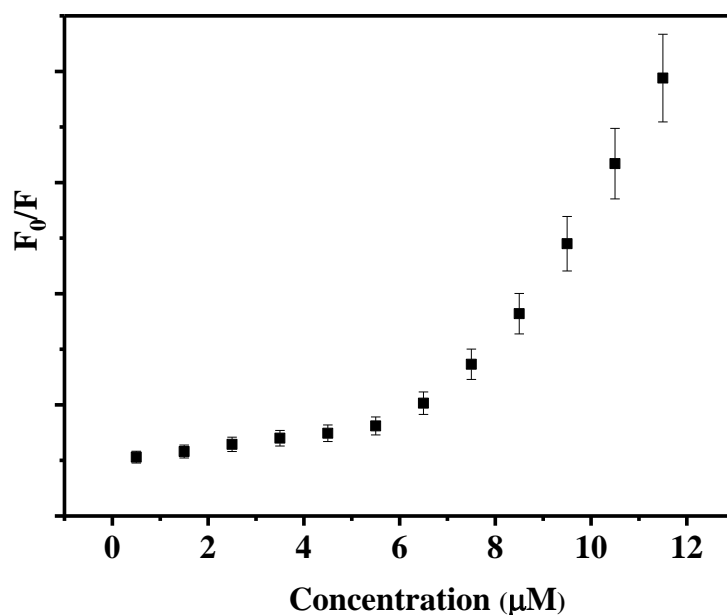

Fig. S10. This figure demonstrates the reproducibility of the sensor material. Each data point is derived from three different batches of MoS<sub>2</sub> QDs and three repeat measurements.

| Materials                                           | Mechanism         | Linear range    | Limit of detection | Selectivity                                                                               | Reusability   | Ref |
|-----------------------------------------------------|-------------------|-----------------|--------------------|-------------------------------------------------------------------------------------------|---------------|-----|
| Lanthanide-titanium oxo clusters (LTOCs)            | Static quenching  | 0-9 ppm         | 10.5 ppb           | PhMe, PhCl, PhCHO, PhNH <sub>2</sub>                                                      | Not discussed | 1   |
| Metal-organic frameworks (MOFs)                     | Electron transfer | 0-200 μM        | 28.9 μM            | MeCN, DMF, THF, MeOH, benzene, toluene                                                    | Not discussed | 2   |
| Graphene oxide                                      | Redox reaction    | 0.1-0.9 μM      | 66 nM              | phenol, catechol, hydroquinone, resorcinol                                                | Yes           | 3   |
| Eu(III) doped zinc MOFs                             | Electron transfer | 0-25 ppm        | 0.97 ppm           | MeOH, IPA, EtOH, THF, DMA                                                                 | Not discussed | 4   |
| ZnSnO <sub>3</sub> -g-C <sub>3</sub> N <sub>4</sub> | Electron transfer | 30-100 μM       | 2.2 μM             | 4-nitrophenol, 1-chloro,2,4-dinitrobenzene, 1-bromo,2-nitrobenzene, 1-iodo,2-nitrobenzene | Yes           | 5   |
| Chitin hydrogel stabilized graphite (GR-CHI)        | Electron transfer | 0.1 to 594.6 μM | 37 nM              | p-, o-, & m-nitrophenol, uric acid, ascorbic acid, dopamine.                              | Yes           | 6   |

|        |                           |                    |               |                                                                                                                         |     |   |
|--------|---------------------------|--------------------|---------------|-------------------------------------------------------------------------------------------------------------------------|-----|---|
| Ag NPs | $\pi$ - $\pi$ interaction | 0.5 to 900 $\mu$ M | 0.261 $\mu$ M | 4-bromo nitrobenzene, 4-chloro nitrobenzene, 4-nitroaniline, 4-nitrobenzoic acid, acetamido phenol                      | Yes | 7 |
| Au-NPs | Redox reaction            | 0.1 – 600 $\mu$ M  | 0.016 $\mu$ M | nitro anilines, 4-chloro nitrobenzene, phenol, resorcinol, catechol, hydroquinone, 4-nitro benzoic acid, 4-nitro phenol | Yes | 8 |

Table S1: Comparison of present NB sensor with previously reported fluorescence based NB sensors.

| System              | $\tau_1$<br>(ns) | $\alpha_1$<br>(%) | $\tau_2$<br>(ns) | $\alpha_2$<br>(%) | $\tau_3$<br>(ns) | $\alpha_3$<br>(%) | $\langle\tau\rangle$<br>(ns) | $\chi^2$ |
|---------------------|------------------|-------------------|------------------|-------------------|------------------|-------------------|------------------------------|----------|
| MoS <sub>2</sub> QD | 1.78             | 19.54             | 6.13             | 32.84             | 19.46            | 47.62             | 16.62                        | 1.18     |
| 1 $\mu$ M NB        | 1.75             | 19.85             | 5.75             | 30.97             | 16.37            | 49.88             | 14.05                        | 1.19     |
| 2 $\mu$ M NB        | 1.68             | 26.01             | 5.66             | 30.12             | 16.13            | 43.87             | 13.50                        | 1.20     |
| 3 $\mu$ M NB        | 1.54             | 26.12             | 5.41             | 29.34             | 15.83            | 44.55             | 13.36                        | 1.20     |
| 4 $\mu$ M NB        | 1.45             | 29.54             | 5.40             | 30.34             | 15.99            | 40.12             | 13.21                        | 1.17     |
| 5 $\mu$ M NB        | 1.25             | 30.36             | 4.38             | 37.55             | 15.19            | 45.09             | 12.80                        | 1.17     |
| 6 $\mu$ M NB        | 0.84             | 39.86             | 4.35             | 28.43             | 15.18            | 23.71             | 11.52                        | 1.13     |
| 7 $\mu$ M NB        | 0.76             | 50.3              | 4.11             | 26.71             | 14.97            | 22.98             | 11.44                        | 1.2      |
| 8 $\mu$ M NB        | 0.59             | 54.26             | 4.02             | 29.01             | 13.68            | 22.73             | 10.39                        | 1.2      |
| 9 $\mu$ M NB        | 0.51             | 57.69             | 3.94             | 28.63             | 12.14            | 23.68             | 9.29                         | 1.2      |
| 10 $\mu$ M NB       | 0.45             | 66.68             | 3.46             | 26.78             | 11.05            | 26.54             | 8.77                         | 1.2      |

Table S2. The lifetime component of MoS<sub>2</sub> QDs and MoS<sub>2</sub> QDs-NB shows concentration dependence (of NB) on lifetime value. All decay profiles are fitted into tri-exponential functions. A decrease in average lifetime values of MoS<sub>2</sub> QDs-NB system implies the interaction of excited state MoS<sub>2</sub> QDs and with NB.



## **Fluorescence quenching efficiency calculation**

### **Using steady-fluorescence data**

$$E_F = 1 - (F_{DA}/F_D) \quad \text{----- (Eq. S1)}$$

Where,

$F_{DA}$  is the fluorescence intensity of Doner in the presence of Acceptor.

$F_D$  is the fluorescence intensity of Doner alone.

Fluorescence quenching efficiency = 79 %

### **Dynamic quenching efficiency calculation**

#### **Using time-resolved fluorescence data**

$$E_D = 1 - (\tau_{DA}/\tau_D) \quad \text{----- (Eq. S2)}$$

Where,

$\tau_{DA}$  is the fluorescence lifetime of Doner in the presence of Acceptor.

$\tau_D$  is the fluorescence lifetime of Doner alone

Dynamic quenching efficiency = 47.3 %

## **Reference**

- 1 H. Zheng, Y. K. Deng, M. Y. Ye, Q. F. Xu, X. J. Kong, L. S. Long and L. S. Zheng, *Inorg. Chem.*, 2020, **59**, 12404–12409.
- 2 L. Yang, C. Lian, X. Li, Y. Han, L. Yang, T. Cai and C. Shao, *ACS Appl. Mater. Interfaces*, 2017, **9**, 17208–17217.
- 3 A. M. S. M. M. Otrokov, I. I. Klimovskikh, F. Calleja, J. H. D. O. Vilkov, A. G. Rybkin, D. Estyunin, S. Mu, H. O. A. L. Vázquez de Parga, R. Miranda and A. A. F. Guinea, J. I. Cerdá, E. V. Chulkov, 2018, 0–13.
- 4 S. Xian, H. L. Chen, W. L. Feng, X. Z. Yang, Y. Q. Wang and B. X. Li, *J. Solid State Chem.*, 2019, **280**, 120984.
- 5 S. Vinoth, P. Mary Rajaiatha and A. Pandikumar, *Compos. Sci. Technol.*, 2020, **195**, 108192.
- 6 R. Sakthivel, S. Palanisamy, S. M. Chen, S. Ramaraj, V. Velusamy, P. Yi-Fan, J. M. Hall and S. K. Ramaraj, *J. Taiwan Inst. Chem. Eng.*, 2017, **80**, 663–668.
- 7 C. Karuppiyah, K. Muthupandi, S. M. Chen, M. A. Ali, S. Palanisamy, A. Rajan, P. Prakash, F. M. A. Al-Hemaid and B. S. Lou, *RSC Adv.*, 2015, **5**, 31139–31146.
- 8 R. Emmanuel, C. Karuppiyah, S. M. Chen, S. Palanisamy, S. Padmavathy and P. Prakash, *J. Hazard. Mater.*, 2014, **279**, 117–124.
